# Supplementary material for: Antibodies against a short region of PfRipr inhibit Plasmodium falciparum merozoite invasion and PfRipr interaction with Rh5 and SEMA7A
Source: PubMed Central journal article supplement (PMC7171142; doi:10.1038/s41598-020-63611-6), 2020-04-20
Supplement: 41598_2020_63611_MOESM1_ESM.pdf [file 41598_2020_63611_MOESM1_ESM.pdf]

1 **Supplementary Materials and Methods, Tables, and Figures**

2

3 **Antibodies against a short region of PfRipr inhibit *Plasmodium falciparum* merozoite**  
4 **invasion and PfRipr interaction with Rh5 and SEMA7A**

5

6 Hikaru Nagaoka<sup>1</sup>, Bernard N. Kanoi<sup>1</sup>, Edward H. Ntege<sup>1#a</sup>, Masamitsu Aoki<sup>2</sup>, Akihisa  
7 Fukushima<sup>2</sup>, Takafumi Tsuboi<sup>1</sup>, Eizo Takashima<sup>1\*</sup>

8

9 <sup>1</sup>Division of Malaria Research, Proteo-Science Center, Ehime University, 3 Bunkyo-cho,  
10 Matsuyama, Japan,

11 <sup>2</sup>Sumitomo Dainippon Pharma Co., Ltd, 3-1-98, Kasugadenaka, Konohanaku, Osaka 554-0022,  
12 Japan.

13

14 <sup>#a</sup> Current Address: Department of Plastic and Reconstructive Surgery, University of the  
15 Ryukyus School of Medicine and Hospital, Okinawa, Japan

16

17 \*Corresponding author: Eizo Takashima

18 Address: Division of Malaria Research, Proteo-Science Center, Ehime University, Japan, 3  
19 Bunkyo-cho, Matsuyama, 790-8577, Japan.

20 Tel.: +81-89-927-9939

21 E-mail: [eizo.takashima.mz@ehime-u.ac.jp](mailto:eizo.takashima.mz@ehime-u.ac.jp)

## 22 **Supplementary materials and methods**

### 23 **Preparation of parasite schizont extracts and Western blot analysis**

24 Western blot analyses were conducted as described <sup>1</sup>. Briefly, purified schizont-rich  
25 parasite pellets from the *P. falciparum* 3D7 strain were directly lysed in reducing SDS-PAGE  
26 sample buffer. The lysate was incubated at 37°C for 30 min, centrifuged at 10,000 × g for 10  
27 min at 4°C, supernatant collected, and resolved by SDS-PAGE on a Bolt™ 4-12 % Bis-Tris  
28 Plus (Invitrogen). Following electroblotting onto a polyvinylidene difluoride membrane with  
29 0.2 μm pore size (Hybond LFP; GE Healthcare) with a semidry blotting system (Bio-Rad,  
30 Hercules, CA), the membrane was incubated with primary antibodies diluted at 1:1000 antisera  
31 to wash buffer ratio of rabbit anti-HA antibody (Abcam), rabbit anti-EBA175 (region III-V)  
32 antibody, rat anti-PfRipr antibody, rabbit anti-GST antibody (Santa Cruz Biotechnology), and  
33 rat antibodies to each of the PfRipr truncates. After washing, the membrane was probed with  
34 horseradish peroxidase-conjugated secondary-antibody (GE Healthcare) and visualized with  
35 Immobilon Western chemiluminescent horseradish peroxidase substrate (Millipore, Billerica,  
36 MA) on a LAS 4000 Mini luminescent-image analyzer (GE Healthcare). The relative  
37 molecular masses of the proteins were estimated with reference to Precision Plus protein  
38 standards (Bio-Rad). Where stated, striped membrane was washed and blocked before re-  
39 probing with a second antibody.

40

### 41 **Erythrocyte binding assay (EBA)**

42 Human erythrocytes were washed three times in incomplete RPMI medium (iRPMI;  
43 RPMI 1640 medium with L-glutamine, 25 mM HEPES buffer, and 50 mg/l of hypoxanthine  
44 without sodium bicarbonate (Invitrogen)) before use. Enzyme treatments of erythrocytes were  
45 done as described <sup>1</sup>.

46 Erythrocyte binding assays (EBA) were performed with native EBA175 and PfRipr  
47 shed in the culture supernatant of transfected parasites. Ninety  $\mu\text{l}$  of concentrated ( $\times 20$ ) culture  
48 supernatant was incubated with 10  $\mu\text{l}$  of untreated and enzyme-treated human erythrocytes on  
49 a rotating wheel for 60 min at RT. After incubation the tube was centrifuged at  $2,000 \times g$  for 5  
50 min at  $4^\circ\text{C}$  and supernatant was removed. The pellet was incubated with 200  $\mu\text{l}$  of tetanolysin  
51 solution (final concentration of 1  $\mu\text{g}/\text{ml}$  in iRPMI) for 10 min at  $37^\circ\text{C}$  for hemolysis, and the  
52 reaction mixture was centrifuged at  $13,000 \times g$  for 10 min to collect erythrocyte membranes.  
53 After repeating the centrifugation a total of three times, the erythrocyte membrane was  
54 resuspended in 200  $\mu\text{l}$  of iRPMI and transferred to a new tube. The tube was centrifuged at  
55  $13,000 \times g$  for 10 min and 60  $\mu\text{l}$  of reducing SDS-PAGE sample buffer added after the removal  
56 of the supernatant. The samples were incubated at  $37^\circ\text{C}$  for 30 min and subsequently resolved  
57 by SDS-PAGE. Following Western blotting as described above, native PfRipr and EBA175  
58 proteins were detected by the respective rabbit antibodies as primary antibodies.

59 For EBA with recombinant proteins (Ecto-PfRipr and His-GST), each recombinant  
60 protein was incubated in 100  $\mu\text{l}$  of untreated and enzyme-treated human erythrocytes with 50%  
61 hematocrit (final concentration of recombinant protein was 3.5  $\mu\text{M}$ ). The abundance of protein  
62 bound to the erythrocytes was determined as described for EBA with native proteins above.

63

#### 64 **Protein-protein interactions by AlphaScreen**

65 Interaction between PfRipr and the 13 erythrocyte surface proteins was quantified by  
66 AlphaScreen as described <sup>2</sup>. Briefly, reactions were carried out in a 20  $\mu\text{l}$  reaction volume per  
67 well in 384-well OptiPlate microtiter plates (PerkinElmer). First, affinity-purified Ecto-PfRipr  
68 recombinant protein was biotinylated using a Biotin Labeling Kit-NH<sub>2</sub> (Dojindo Molecular  
69 Technologies, Kumamoto, Japan) according to the manufacturer's instruction. Secondly, 5  $\mu\text{l}$   
70 of 10 nM biotinylated protein was mixed with 5  $\mu\text{l}$  of 10 nM each erythrocyte surface protein

71 in reaction buffer (100 mM Tris-HCL [pH 8.0], 0.01% [v/v] Tween-20 and 0.1 mg/ml [w/v]  
72 bovine serum albumin), and incubated for 1 h at 26°C to form a protein-protein complex.  
73 Subsequently, a 10 µl suspension of streptavidin-coated donor-beads and anti-GST acceptor-  
74 beads (PerkinElmer) mixture in 1:1 (v/v) in the reaction buffer was added to a final  
75 concentration of 15 µg/ml of both beads. The mixture was incubated at 26°C for 12 h in the  
76 dark to allow the donor- and acceptor-beads to optimally bind to biotin and GST, respectively.  
77 Upon illumination of this complex, a luminescence signal at 620 nm was detected using an  
78 EnVision plate reader (PerkinElmer) and the results were expressed as AlphaScreen counts.  
79 GST tagged Rh5, known to interact with PfrRipr, was included as a positive control while His-  
80 GST as a negative control.

81

## 82 **Surface plasmon resonance (SPR)**

83 All SPR experiments were performed using a Biacore X100 instrument (GE  
84 Healthcare) according to the manufacturer's instructions and as reported (ref 56). The Biacore  
85 X100 evaluation software was used for single-cycle or affinity binding analysis. Sensor CM5,  
86 amine coupling reagents, GST capture kit, and buffers were purchased from GE Healthcare.  
87 Fresh HBS-EP+ (10 mM HEPES, pH 7.4, 150 mM NaCl, 3 mM EDTA, 0.05% (v/v) surfactant  
88 P20) was used as a running buffer for all SPR experiments. Blank flow cells were used to  
89 subtract buffer effects on sensorgrams. After subtraction of the contribution of bulk refractive  
90 index, and nonspecific interactions with the CM5 chip surface, individual association ( $k_a$ ) and  
91 dissociation ( $k_d$ ) rate constants were obtained by global fitting of data. Measurement conditions  
92 were optimized so that the contribution of mass transport to the observed values of  $K_D$  was  
93 negligible.

94 Recombinant Ecto-PfrRipr immobilized on a sensor CM5 chip was used as the ligand  
95 while either Rh5, CyRPA, His-GST, SEMA7A, AMIGO2, or NPTN was used as analyte. All

96 assays were performed at increasing analyte concentrations of 3.13, 6.25, 12.5, 25, and 50 nM  
97 at a contact time of 120 s and dissociation time of 180 s with the last dissociation extended up  
98 to 3000 s.

99 The potency of anti-PfRipr\_5 antibodies to inhibit interaction between recombinant  
100 Ecto-PfRipr and either recombinant Rh5, CyRPA, or SEMA7A, was also assessed, Specifically,  
101 recombinant GST-fused Rh5, CyRPA, or SEMA7A proteins at 300 nM were captured  
102 individually on SPR sensor chips using a GST-capture kit, Ecto-PfRipr protein was added as  
103 followed by addition of analyte consisting of 300 nM of recombinant and 300 nM of anti-  
104 PfRipr\_5 antibodies.

105

106

107 1 Arumugam, T. U. *et al.* Discovery of GAMA, a *Plasmodium falciparum* merozoite  
108 micronemal protein, as a novel blood-stage vaccine candidate antigen. *Infect Immun* **79**,  
109 4523-4532, doi:10.1128/IAI.05412-11 (2011).

110 2 Nagaoka, H. *et al.* PfMSA180 is a novel *Plasmodium falciparum* vaccine antigen that  
111 interacts with human erythrocyte integrin associated protein (CD47). *Sci Rep* **9**, 5923,  
112 doi:10.1038/s41598-019-42366-9 (2019).

113

114

115

116

**Table S1: PfRipr Codon optimized sequence for expression with Wheat Germ Cell Free**

**System**

ATGGATCTGATCGAGGGCATCTTCTACGAGAAGAACGAGATCGACAAGCTCACCTTCTCCCTGGACCACAGGGTCCGGGATAACCTCAAGACG  
GACCTCATCCTGAACAACAACGGCGGAGAACGATTACGCGTACCTGAACAAGTATGTGTACACCATCCTCAACAGGGACTCAACCGAGAAGATC  
AAGACGTTCTTCTCTCAACAAGGATATGAAGTCTTGGACTACTTCATCTCCAAGGAGTACAACCTCCAGCGATAAGACCAACCAAATCTGC  
TACAAGAAGACGTTCTGCGGGCTGGTCATCCCAAACCTCCGAGGAGATCAAGACCAACAAGATCACGAACGACAAGCTCTACTGCGCCATTTC  
AACTCCACCCACATCATCTACTACATCAGCCAGCCACTCCTGCTGGAGCCGACGTTGTGTACGAGGAGACCTTCTTCGAGAAGGGCAAG  
AACGACCAAATCAACTGCCAGGGGATGTACATCTCACTGCGGTCTGCCAGTTTCAATACCCACAACGCGATCCTCCAACAGGAGACCTTGACG  
TACATCAAGAAGCTCTGCGACGGCAAGAACAACTGCAAGTTCGACTTCGATAGCATCAAGTACGAGAACAAGTCCGTCACCCACTACCTGTTTC  
TTCATCAACATCCAGTACCAGTGCATCTCCCGCTCAACCTGCAAGAGAACGAGATGTGCGACGTCTACAACGACGATACCCACAAGGCCACG  
TGCAAGTACGGCTTCAACAAGATCGAGCTGCTCAAGAAGCTTGGAGGAGAACTACCGCTGCACCCAAGATATCTGCTCCGTTAACAGTTC  
TGCGACGGCGAGAACGAGACCTGCACGTGCAAGACGTCGCTGCTCCCTCAGCGAAGAACAACCTGCGAGTACAACGACCTTGCACCGTGTCTG  
AACTGCCCTGAGAACAGCACGTGCGAGCAGATCGGCAACGGGAAGAAGGCTGAGTGCAGTGCAGAACGGCAAGTACTACCATAACAACAAG  
TGCTACACCAAGAACGACCTGGAGCTGGCGATCAAGATCGAGCCACACAAGAAGGAGAAGTCTACAAGAACAACCTTACCAAGGCAAGGCT  
CTGAAGCCGGATACATCTTATGCAAGTGCAGAACGGGTTGAGCATCGAGGTCATCAACGCCTACGCTCTGCTGCTACCGGTTTTTATTC AAC  
CTCAACAAGCTGAAGTATGTGACCGAGTCCCTGAAGAAGATGTGCGATGGCAAGACCAAGTGCAGGACGGAACACGATCGACCAATCGAC  
GATCTCAACCCATAACATCTGCAACAACCTTCAACACCATCTTCAAGTACGATTACCTGTGCGTGTTCACAACCAACAAAACATCAGCTGTGAC  
AAGAACTCCCATCTCCACAGCAACATCCCTCGCTCTACAACCTGCTCAATCTGCCTGACATCAACAAGTCAAGTTCATCTGATCTCCAGG  
AACAGCCGACCAACAGTACCCACACAACAACATCTCCATGCTGGAGATCCAAAACGAGATCTCTTCCATAAACAACCAAGTTCCTTACC  
GACCCGCACAGAACGCAACAACATCAACAACATGAACATCAAGAAGTTCGAGATCTTCCGGTTCGAGATTGAGTTCGAAAGTGCATGCCAG  
GGCGGGAAGATCAACATCGATAAGGCTATCTCAAGGGCGGGGAGGGCTGCAACGACCTGCTCCTGACCAACTCGCTCAAGTCACTACTGCAAC  
GATCTGAGCGAGTGCAGCATCGGGCTCATCTACCATTTCGATACCTACTGATCAACGACCAATACCTGTTCGTTGCTTACAGCTGCTCGAAC  
CTCTGCAACAAGTGCACACAACCTCCACCTGCTACGGCAACAGGTTCAACTACGACTGCTTCTGCGATAACCCATACATCAGCAAGTACGGG  
AACAAAGTGTGCGAGCGCCGAACGATTTGCGAGTCCGTGCTCTGCAGCCAAAACAGGCTGCAAAATCCTCCAAAACGACAAGCTGATCTGC  
CAGTGCAGGAAAGGCTACAAGAACGTGAAGGGGAAGTGCCTCCAGACAACAAGTGCATCTGCTTTCGCGTCCAAAAGGTTGCGTCACTC  
GAGAACGGCAAGCAGACCTGCAAGTGCAGCGAGCGGTTCTGTTGAGAAACGGCGTGTGCATCTGCGCTAACGATTACAAGATGGAGGACGGG  
ATCAACTGCATCGCAAGAACAAGTGAAGAGAAAGGAGTACGAGAACAATCTGCACCAACCCCAACGAGATGTGCGCTTACAACGAGGAGACG  
GACATCTCAAGTGCAGTGCAGGAGCACTACTACCGGTATCTAGAGGGGAGTGCATCTCAACGACTACTGCAAGGATATCAACTGC AAG  
GAGAACGAGGAGTGCCTCATCTTAACCTCAAGCTGAGTGCCTGTCAGGAGAACCTGAAGAAGAACAACAAGGGCGAGTGCATCTACGAG  
AACTCTTGCCTCATCAACGAGGGGAACTGCCCAAGGACTCCAAGTGCATCTACAGGGAGTACAAGCCTCATGAGTGCCTGTGCAACAAGCAA  
GGCCACGTTGCGGTGAACGGGAAGTGCCTTGGAGGACAAGTGCCTTCAACAACAAGAAGTGCAGCGAAGTCACTGCTGCTCAACGTTATG  
AACAAAGGAGCCATCTGCGTGTGCACCTACAACCTACTACAAGAAGGATGGCGTCTGCCTCATCCAGAACCCTTGCCTGAAGGACAACGGCGGG  
TGCTCACGCAACTCTGAGTGCACCTTCAAGTACTCAAGATCAACTGCACGTCAGGAGAACTACAAGAACAAGGACGATCTTTCGCTGCC  
AACACCAACGAGTACGACGAGTCTGTTCAAGTTCAAATACAACGACGATGCCTCAATCATCTCGGCGCGTGCAGGATGATCGAGTTCCTC  
ATCTACAACCAGATCATCTGGAAGATCAACAACCTCAAGGAGAGCTACGTTTTCTACTACGACTACCCGACCGCGGCAACATCGAGGTGCAA  
ATCAAGAACGAGATCTTCCATACCATCATCTACCTCAAGAAGAAGATCGGGAACCTAGTCACTACGACGATTTCAAGTTGACCACCAGACC  
TGCATCTACGAGAACGTGTTCTACTACTCCAACCAGAACCACCATCACCATCACCATTGA

**Codon optimized PfRipr\_5 sequence for expression with Baculovirus protein expression system**

ATGCTCCTCGTCAACCAGTCAATCAAGGCTTCAACAAGAACAATACCTCGAAAATGGTCTCCGCAATCGTGTCTACTGCTGCTGCTGCTGCGTGC  
GCAGCGCACTCAGCTTTCGCTGCGACTTGTCTTGTCCCTCAAACAAGGTGTGCGTCATCGAGAACGGAAAGCAGACCTGCAAAATGTTCCGAG  
AGGTTCTGCTGGAAAACGGAGTCTGCATTTGTGCAACGACTACAAGATGGAGGATGGTATCAACTGCATTGCCAAGAACAAGTGAAGAGA  
AAAGATACGAAAACATCTGCACCAACCCAAACGAAATGTGCGCTTACAACGAGGAAACTGATATTGTGAAGTGCAGTGTAAAGAACAATAC  
TACCGCTCCAGCCGTGGCGAGTGCATCTCAACGACTACTGCAAGGATATTAAGTGAAGAAAACGAGGAATGCTCTATCTCAACTTCAAG  
CCGGAGTGCCTTGTAAAGAAAACCTGAAGAAAACAACAAGGGCGAGTGCATCTACGAAAACCTCTGCTCATTAAACGAGGAAACTGCCCT  
AAGGACAGCAAAATGTATCTACCGGAGTACAAGCCCAAGATGCGTCTGTAAACAAGCAAGGTCATGTTGCTGTGAACGGCAAGTGCCTCTG  
GAGGATAAATGTGTGCAACAAGAATGAGTGAAGAACTCGATCTGTGTCAACGTTATGAACAAGGAGCCATCTGTGTCTGCACCTACAAC  
TACTACAAAAGGACCATCATCATCATCATC

117  
118  
119

**Table S2: List of PCR primers used in this study.**

| for pD      | Primer sequence                                                                    | Insert (amino acids) |
|-------------|------------------------------------------------------------------------------------|----------------------|
| Ripr-tran F | gagagagaCTAGTATGTTTCAGAAATTTTTTACCCTTCTTATAATAATATTAATCAAG                         | M1 - N1086           |
| Ripr-tran R | gagagagaCTGCAGCATTCTGATTACTATAATAAAATACATTTTCATATATACATGTTTGATG                    |                      |
| for pEU     |                                                                                    |                      |
| CyRPA F     | gagagagaCTCGAGATAAATGTGATAGTCGTATGTTTTATAAGGA                                      | I26 - E362           |
| CyRPA R     | gagagagaGCGGCCGCTCAATGGTGATGGTGATGGTGCTCATAGTTAGCATAGTATATAGTATGAATATTATATATCCCTTG |                      |
| PfRipr_1 F  | gagagagaCTCGAGATGGATCTGATCGAG                                                      | D21 - A197           |
| PfRipr_1 R  | gagagagaGCGGCCGCTCAATGGTGATGGTGATGGTGCGCGTTGTGGGTATGAAC                            |                      |
| PfRipr_2 F  | gagagagaCTCGAGATGATCCTCCAACAGGAGACC                                                | I198 - K377          |
| PfRipr_2 R  | gagagagaGCGGCCGCTCAATGGTGATGGTGATGGTGCTTGTGGCTCGATCTTG                             |                      |
| PfRipr_3 F  | gagagagaCTCGAGATGAAGGAGAAAGTTCTACAAGAACAC                                          | K378 - N557          |
| PfRipr_3 R  | gagagagaGCGGCCGCTCAATGGTGATGGTGATGGTGTTGTGATGTTGTGCTGTTTC                          |                      |
| PfRipr_4 F  | gagagagaCTCGAGATGAACATCAAGAAGGTCGAG                                                | M558 - K719          |
| PfRipr_4 R  | gagagagaGCGGCCGCTCAATGGTGATGGTGATGGTGCTGTTGTCTGGGACGC                              |                      |
| PfRipr_5 F  | gagagagaCTCGAGATGTGCGATCTGCTTGCCTC                                                 | C720 - D934          |
| PfRipr_5 R  | gagagagaGCGGCCGCTCAATGGTGATGGTGATGGTGATCCTCTTGTAGTAGTTGTAGGTG                      |                      |
| PfRipr_6 F  | gagagagaCTCGAGATGGCGCTGCTCCTCATCC                                                  | G935 - N1086         |
| PfRipr_6 R  | gagagagaGCGGCCGCTCAATGGTGATGGTGATGGTGTTCTGGTTGGAGTAGTAGAACAC                       |                      |
| PfRipr_7 F  | gagagagaCTCGAGATGACCAACAAATCTGCTACAAG                                              | T108 - R287          |
| PfRipr_7 R  | gagagagaGCGGCCGCTCAATGGTGATGGTGATGGTGCGGAGTAGTTCTCCTCCG                            |                      |
| PfRipr_8 F  | gagagagaCTCGAGATGTGACCCCAAGATATCTGCTC                                              | C288 - I467          |
| PfRipr_8 R  | gagagagaGCGGCCGCTCAATGGTGATGGTGATGGTGATGGTGTTGAAGTTGTTCGAG                         |                      |
| PfRipr_9 F  | gagagagaCTCGAGATGTTCAAGTACGATTACTGTGTC                                             | F468 - N647          |
| PfRipr_9 R  | gagagagaGCGGCCGCTCAATGGTGATGGTGATGGTGTTGTGTGGCACTGTTG                              |                      |
| PfRipr_10 F | gagagagaCTCGAGATGTCCACTGTCTACGGC                                                   | S648 - C830          |
| PfRipr_10 R | gagagagaGCGGCCGCTCAATGGTGATGGTGATGGTGCGACTCTCGTCTCTCTTG                            |                      |
| PfRipr_11 F | gagagagaCTCGAGATGTCCATCTTAACTCAAGCCTG                                              | S831 - I1007         |
| PfRipr_11 R | gagagagaGCGGCCGCTCAATGGTGATGGTGATGGTGATGATCCCGCACGCG                               |                      |
| AMIGO2_F    | GGCGGATATCTCGAATGCTGTACGTACACAC                                                    | M1 - N397            |
| AMIGO2_R    | AAAAGTAGTGCAGCCCTAATGGTGATGGTGATGGTGTTAAATGCCTCATGAGCAT                            |                      |
| BCAM_F      | GGCGGATATCTCGAGAGGTGCGCTTGTCTGTA                                                   | E32 - A555           |
| BCAM_R      | AAAAGTAGTGCAGCCCTAATGGTGATGGTGATGGTGCGCCACGCCATGACGGCC                             |                      |
| CD44_F      | GGCGGATATCTCGACAGATCGATTGAATAAAC                                                   | Q21 - E606           |
| CD44_R      | AAAAGTAGTGCAGCCCTAATGGTGATGGTGATGGTGTTCTGGAATTTGGGGTGTG                            |                      |
| CD47_F      | GGCGGATATCTCGAAAAACAAATCTGTAGAATTCAC                                               | K24 - S139           |
| CD47_R      | AAAAGTAGTGCAGCCCTAATGGTGATGGTGATGGTGTTGAGAAAAACCATGAACAAC                          |                      |
| CD55_F      | GGCGGATATCTCGAGACTGTGGCCTTCCCCCA                                                   | D35 - T381           |
| CD55_R      | AAAAGTAGTGCAGCCCTAATGGTGATGGTGATGGTGAGTCAGCAAGCCCATGGT                             |                      |
| CD58_F      | GGCGGATATCTCGATCCCAACAAATATATGGTGT                                                 | S30 - R215           |
| CD58_R      | AAAAGTAGTGCAGCCCTAATGGTGATGGTGATGGTGCTGTGCTTGAATGACCG                              |                      |
| CD59_F      | GGCGGATATCTCGACTGCACTGCTACAAGTCTG                                                  | L26 - P128           |
| CD59_R      | AAAAGTAGTGCAGCCCTAATGGTGATGGTGATGGTGAGGAGTGAAGCTCCAGGC                             |                      |
| CD99_F      | GGCGGATATCTCGAGATTTATCTGATCCCTTCC                                                  | D27 - G125           |
| CD99_R      | AAAAGTAGTGCAGCCCTAATGGTGATGGTGATGGTGCTGGGCGTCCGGCCTC                               |                      |
| ERMAP_F     | GGCGGATATCTCGACACGACAGGGGATGCCGCG                                                  | H30 - S154           |
| ERMAP_R     | AAAAGTAGTGCAGCCCTAATGGTGATGGTGATGGTGAGGGGAGAGACTCCC                                |                      |
| F11R_F      | GGCGGATATCTCGACTCTTCTGAACCTGAAG                                                    | H32 - V238           |
| F11R_R      | AAAAGTAGTGCAGCCCTAATGGTGATGGTGATGGTGGACCCACATTCGGCTC                               |                      |
| ICAM4_F     | GGCGGATATCTCGAGCGCTGGGACGCCGGACT                                                   | A23 - G272           |
| ICAM4_R     | AAAAGTAGTGCAGCCCTAATGGTGATGGTGATGGTGGCCACCATGTATGGCCAT                             |                      |
| NPTN_F      | GGCGGATATCTCGACAGAACGAGCAAGGATTG                                                   | Q29 - L221           |
| NPTN_R      | AAAAGTAGTGCAGCCCTAATGGTGATGGTGATGGTGCAGGTGCTCCGACCTC                               |                      |
| SEMA7A_F    | GGCGGATATCTCGACAGGCCACCTAAGGAGC                                                    | Q45 - H666           |
| SEMA7A_R    | AAAAGTAGTGCAGCCCTAATGGTGATGGTGATGGTGGACCAAGCCAAG                                   |                      |

122 **Figure S1**

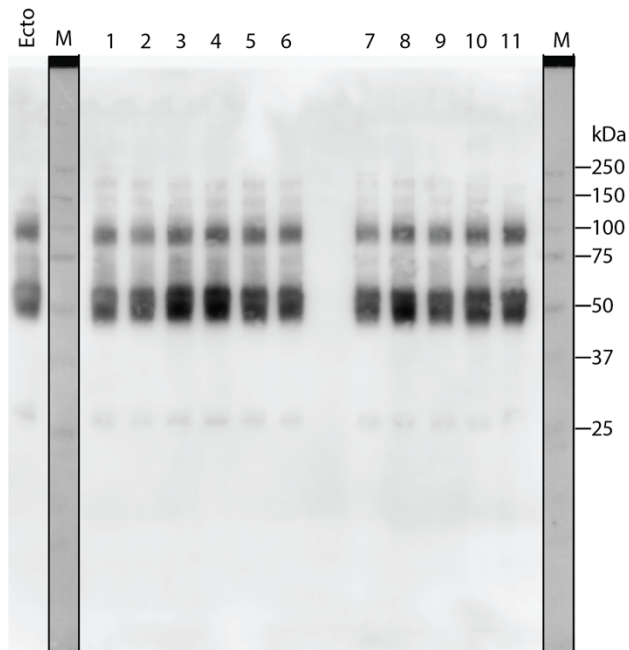

123  
124

125 **Figure S1**

126 Western blot analysis of Native PfRipr. PfRipr expressed in the parasites was immuno-  
127 precipitated with rat antibodies to Ecto-PfRipr and each of the 11 PfRipr truncate  
128 regions. In the Western blot the immunoprecipitated PfRipr was detected with mouse  
129 anti-Ripr\_5-BPES antibodies.



130  
131  
132  
133

**Figure S2**

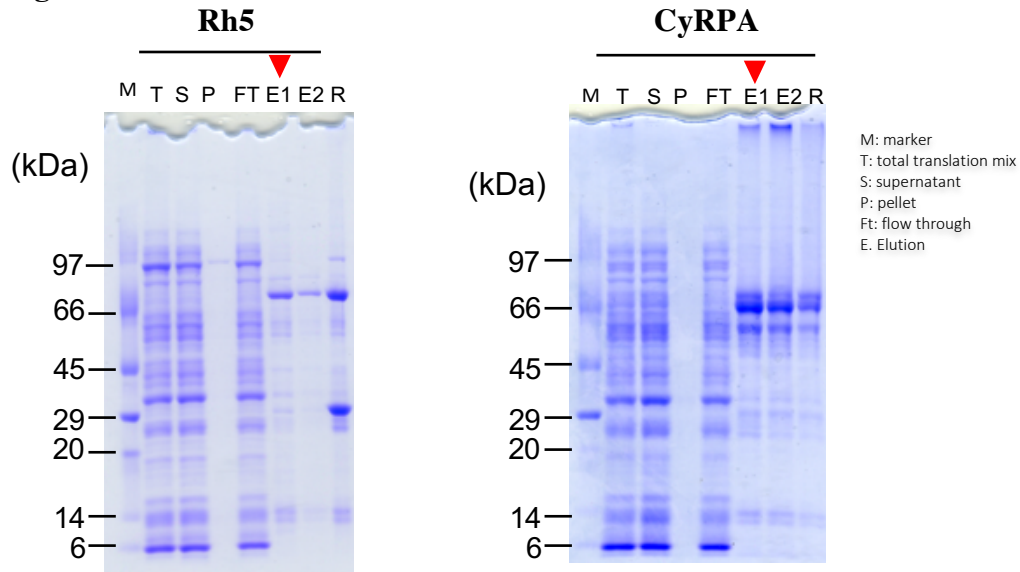

146

▼ Presented in the main manuscript

147

**Figure S2**

149

Recombinant Rh5 and CyRPA protein expression. Recombinant Rh5 and CyRPA

150

proteins were expressed with WGCFS as GST-fused proteins with a C-terminal His-

151

tag. The proteins were resolved by 12.5% SDS-PAGE under reducing condition and

152

stained with CBB.

153 **Figure S3**

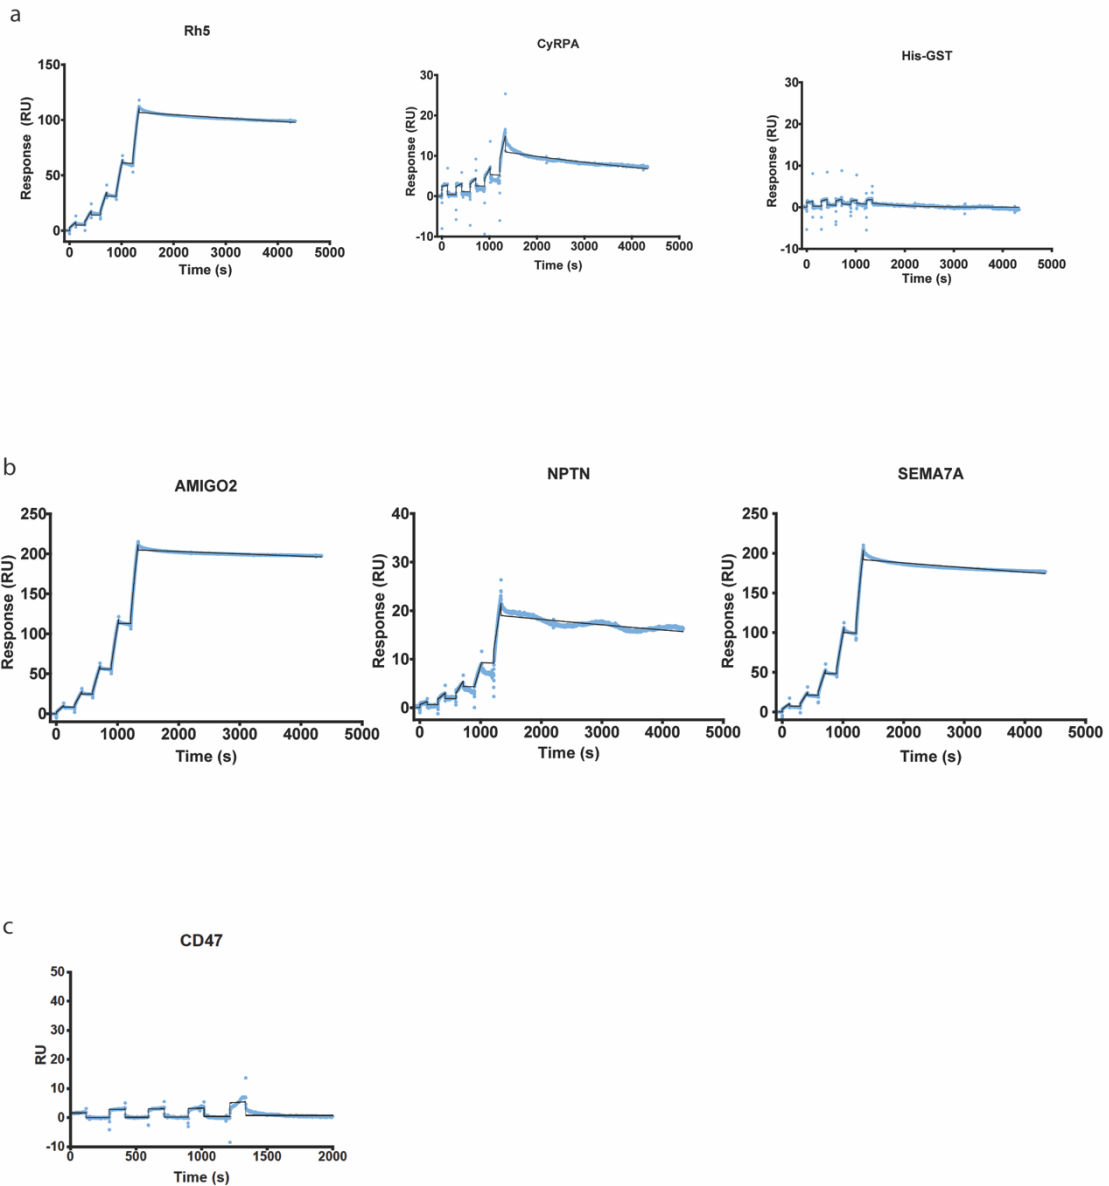

154  
155

156 **Figure S3**

157 SPR single-cycle kinetic analysis sensorgrams. Recombinant Ecto-PfRipr immobilized  
158 on a sensor CM5 chip was used as the ligand while the indicated proteins were used as  
159 analyte. The blue curve represents the data-generated sensorgram while the black curve  
160 indicates line of fit used to calculate kinetics parameters. All assays were performed at  
161 increasing protein concentrations of 3.13, 6.25, 12.5, 25, and 50 nM at a contact time  
162 of 120 s and extended dissociation time of 3000 s.

163 **Figure S4**

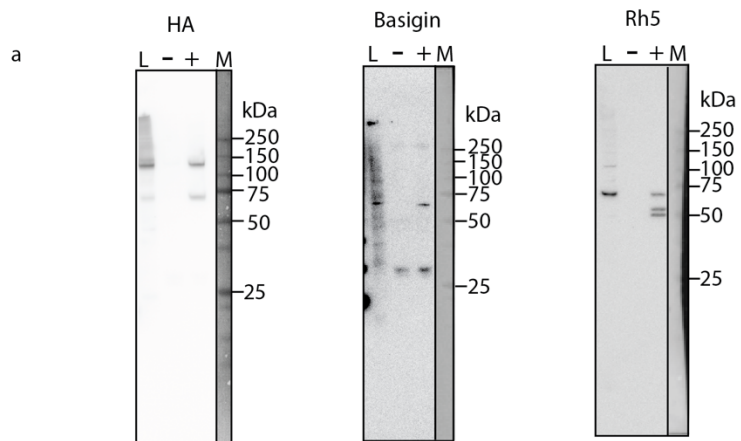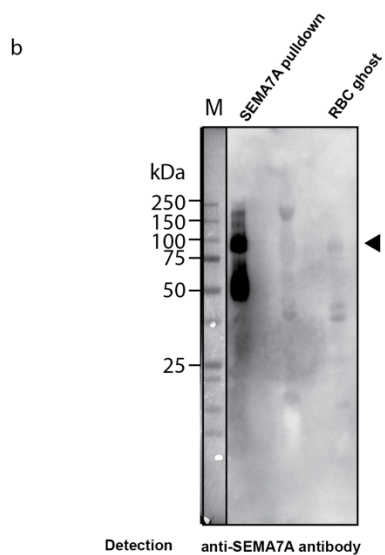

164  
165  
166

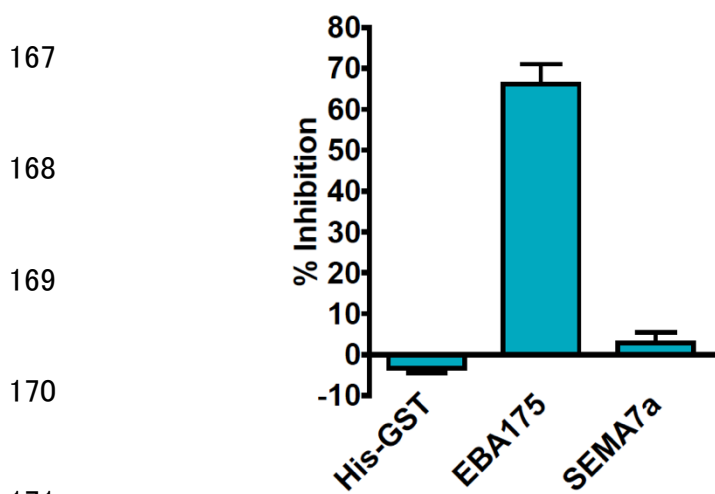

170  
171

172

173 **Figure S4**

- 174 a. Western blot analysis: PfRipr-HA expressed in the parasites was immunoprecipitated  
175 with anti-HA antibody conjugated on the surface of magnetic beads. L, parasite lysate  
176 prepared from PfRipr-HA parasite; −, immunoprecipitated sample with 3D7 parasite;  
177 and +, immunoprecipitated sample with PfRipr-HA lysate. Western blotting was  
178 conducted with the indicated primary antibodies; namely, rat anti-HA antibody, mouse  
179 anti-basigin monoclonal antibody, and rabbit anti-Rh5 antibody. The same  
180 immunoprecipitation lysate per parasite line was used in the three membranes.
- 181 b. Western blot analysis: erythrocyte ghost sample and SEMA7A immunoprecipitated  
182 with rabbit anti-SEMA7A polyclonal antibodies were both probed with anti-SEMA7A  
183 polyclonal antibodies. Anti-SEMA7A antibody successfully pulled down SEMA7A.  
184 Arrowhead, SEMA7A.
- 185 c. GIA assay: Anti-SEMA7A antibody did not show GIA activity
